# Supplementary material for: Anti-IgLON5 antibodies cause progressive behavioral and neuropathological changes in mice
Source: PubMed Central journal article supplement (PMC9188070; doi:10.1186/s12974-022-02520-z), 2022-06-11

# Supplementary Figure 3

**A** Day 7

Patient  
IgG

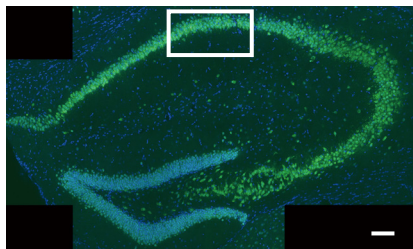

Day 30

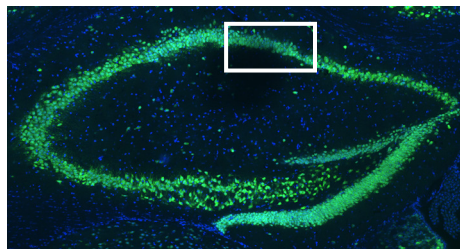

Control  
IgG

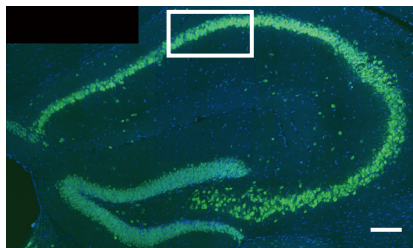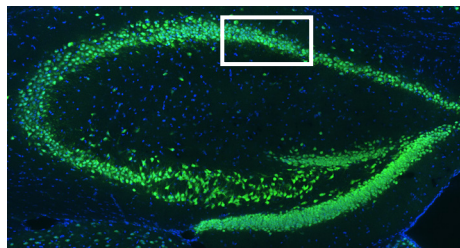

Supplement: 12974_2022_2520_MOESM4_ESM.pdf [file 12974_2022_2520_MOESM4_ESM.pdf]
