# Supplementary material for: Anti-IgLON5 antibodies cause progressive behavioral and neuropathological changes in mice
Source: PubMed Central journal article supplement (PMC9188070; doi:10.1186/s12974-022-02520-z), 2022-06-11

# Supplementary Figure 5

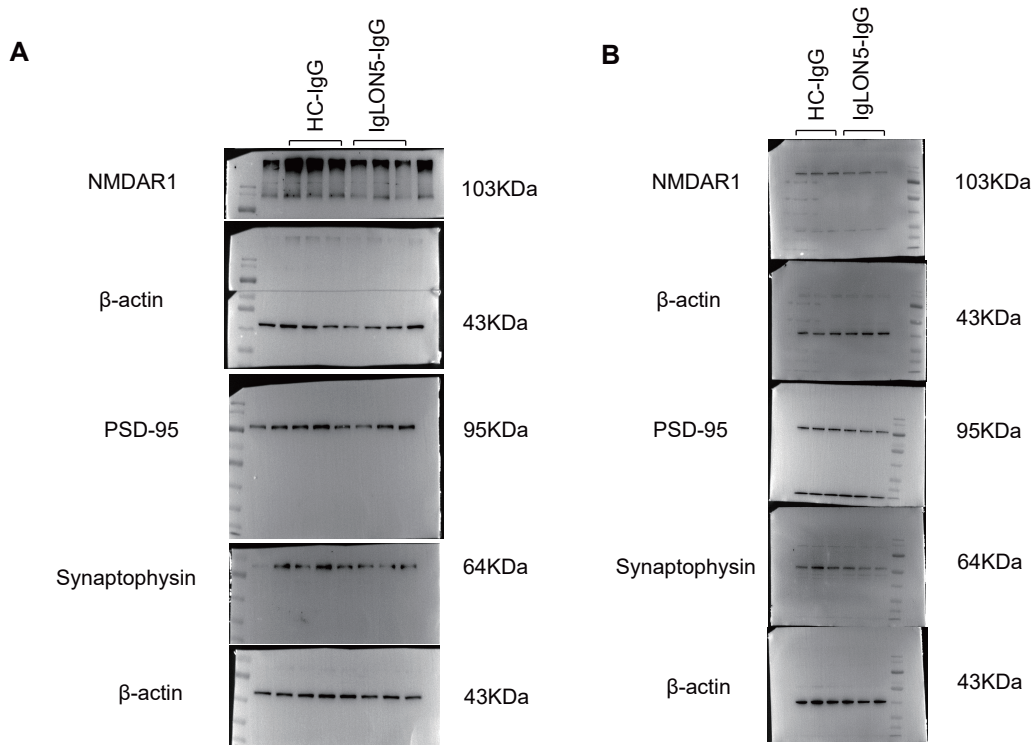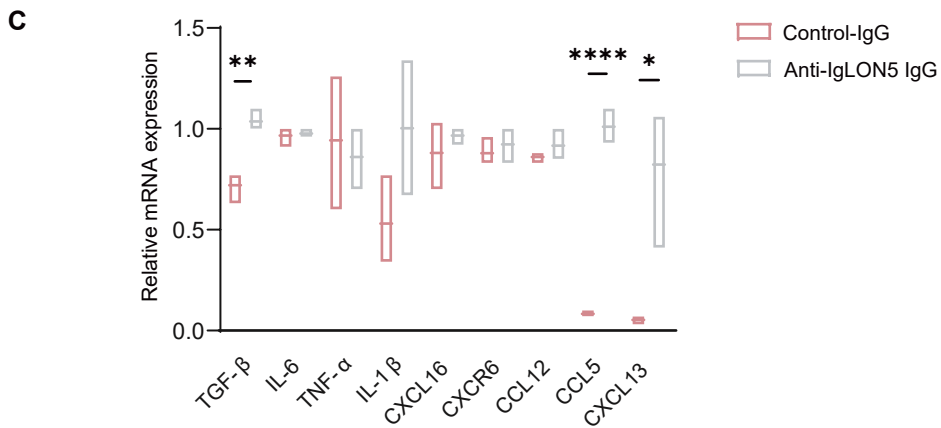

Supplement: 12974_2022_2520_MOESM6_ESM.pdf [file 12974_2022_2520_MOESM6_ESM.pdf]
